# Supplementary material
Source: PubMed Central journal article supplement (PMC2777932)

## SUPPLEMENTARY INFORMATIONS

### **Sup. 1. The depolymerizing effect of wt $\alpha$ -synuclein is not due to severing of actin filaments.**

(A) Kinetics of actin depolymerization. Experiments were performed in a fluorometer at 30 °C. Purified actin (5  $\mu$ M; 5 % pyrenylated) was polymerized at high salt (85 mM NaCl, 30 mM KCl, 1 mM MgCl<sub>2</sub> and 0.1  $\mu$ M CaCl<sub>2</sub>) in the absence (CTRL = controls) or presence of 6  $\mu$ M wt or A30P  $\alpha$ -synuclein. At time 0, actin was diluted 50 fold in buffer without salts to a final concentration of 0.1  $\mu$ M. (B) Fold changes of the actin maximum depolymerization rate induced by 6  $\mu$ M wt or A30P  $\alpha$ -synuclein. (C) Actin was polymerized in high salt for 1 hr and then incubated for 1 hr with either gelsolin (1  $\mu$ M), wt or A30P  $\alpha$ -synucleins (6  $\mu$ M) and/or cytochalasin D (cytoD, 4  $\mu$ M). The samples were then centrifuged at 355,000 x g for 30 min. Pellets and supernatants were loaded on an SDS-PAGE gel and stained with Coomassie blue. Gelsolin, used as a positive control for an actin-severing activity, reduces the amount of actin filaments recovered in the pellet, an effect which is observed with neither wt nor A30P  $\alpha$ -synucleins, even in the presence of a capping agent such as cytochalasin D.

### **Sup. 2. $\alpha$ -Synuclein expression does not affect either cell proliferation or actin phosphorylation, and IPTG treatment does not affect the rate of actin cytoskeleton disassembly and reassembly.**

(A) Proliferation rate of N2A cells, either non transfected (CTRL) or stably expressing wt or A30P  $\alpha$ -synucleins. (B) non transfected MDCK cells, treated or not with IPTG and fixed either before the addition of LatA (NO LatA) or after 3 or 10 min of incubation with the drug (LatA), followed or not by 20, 40 or 60 min of recovery (LatA rec). (C) Anti-actin immunoprecipitate obtained from lysates of non transfected MDCK cells, treated or not with IPTG, and of induced clones expressing either wt or A30P  $\alpha$ -synucleins, stained with anti-phosphoserine antibody (left panel) and with anti-actin antibody (right panel). Actin is phosphorylated at similar low levels in all four samples. As a reference for actin staining, 0.5  $\mu$ g of purified actin (actin) was loaded onto the gels. Bar in B: 10  $\mu$ m.

**Video 1.** Time-lapse movie (8 frames/sec) of a LatA experiment in a MDCK clone transiently transfected with actin-GFP. Frames, collected every 30 sec, are represented as Z-projection of 12 stacks.

**Video 2.** Time-lapse movie (8 frames/sec) of a LatA experiment in a MDCK clone transiently transfected with actin-GFP and induced by IPTG to express wt  $\alpha$ -synuclein. Frames, collected every 30 sec, are represented as Z-projection of 12 stacks.

**Video 3.** Time-lapse movie (8 frames/sec) of a LatA experiment in a MDCK clone transiently transfected with actin-GFP and induced by IPTG to express A30P  $\alpha$ -synuclein. Frames, collected every 30 sec, are represented as Z-projection of 12 stacks.

**A**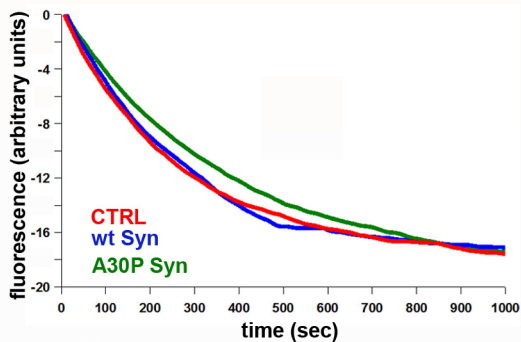**B**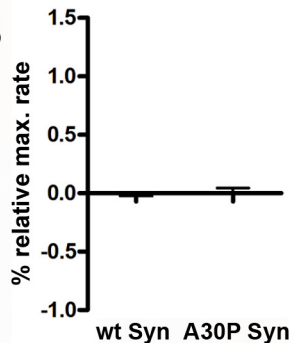**C**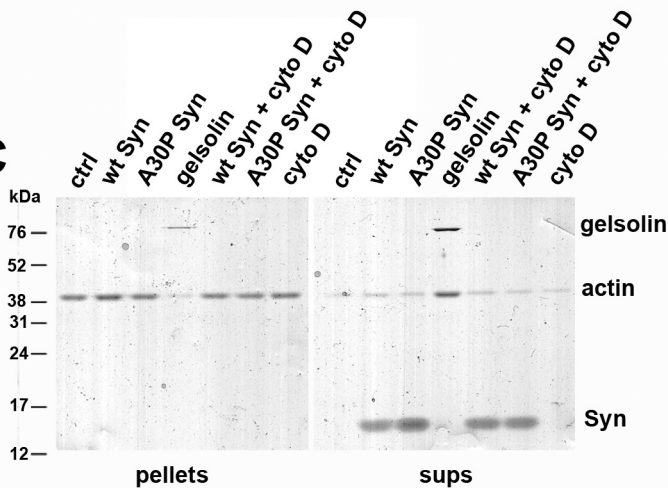

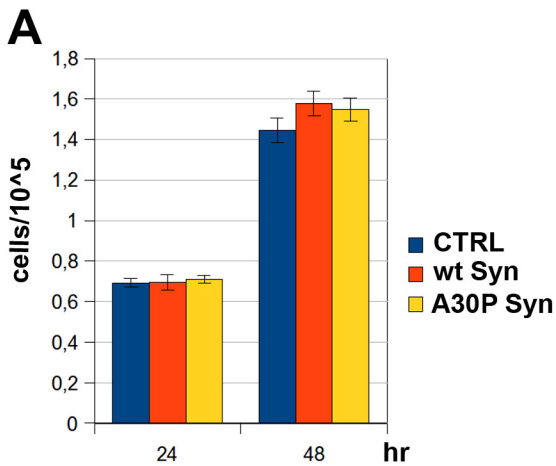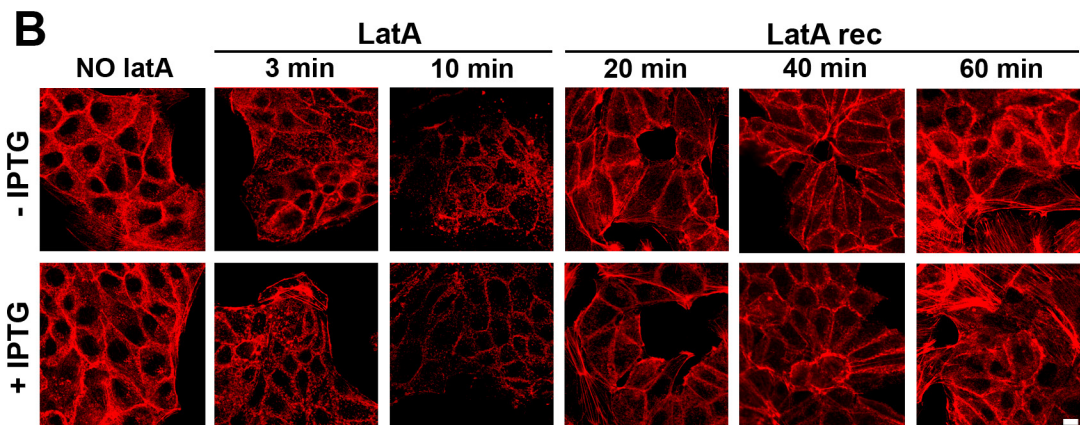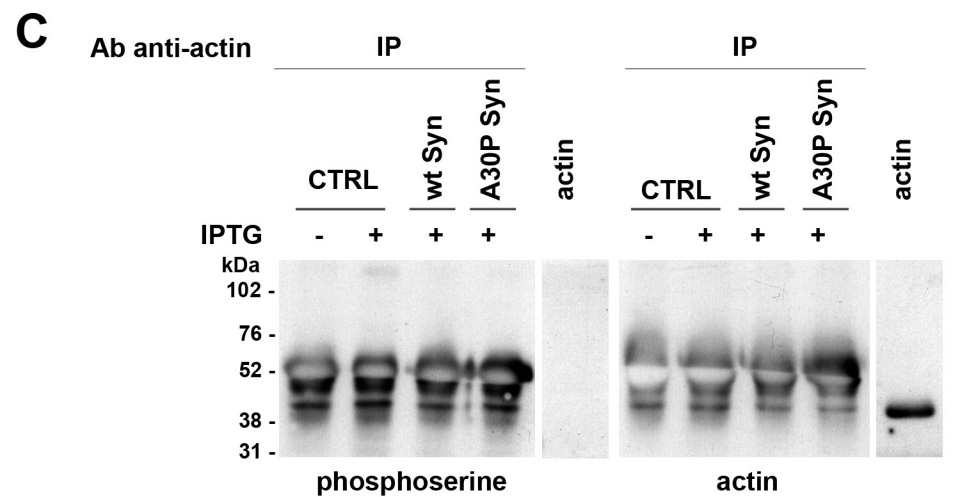

Supplement: E08-03-0302_1.pdf [file E08-03-0302_1.pdf]
